# Supplementary material for: Understanding the Remodelling of Cell Walls during Brachypodium distachyon Grain Development through a Sub-Cellular Quantitative Proteomic Approach
Source: MDPI journal article supplement (doi:10.3390/proteomes4030021), 2016-06-24
Supplement: s1 [file s1]

Mathilde Francin-Allami, Virginie Lollier, Marija Pavlovic, H  l  ne San Clemente,  
H  l  ne Rogniaux, Elisabeth Jamet, Fabienne Guillon and Colette Larr  

| Functional Classes                           | 9 DAF | 13 DAF | 19 DAF |
|----------------------------------------------|-------|--------|--------|
| Miscellaneous                                | 55    | 55     | 48     |
| Oxido-reductases                             | 51    | 52     | 47     |
| Proteases                                    | 67    | 62     | 59     |
| Proteins acting on cell wall polysaccharides | 108   | 103    | 105    |
| Proteins related to lipid metabolism         | 46    | 42     | 49     |
| Proteins with interaction domains            | 32    | 31     | 28     |
| Signaling                                    | 28    | 26     | 24     |
| Structural proteins                          | 2     | 2      | 2      |
| Unknown function                             | 46    | 45     | 50     |

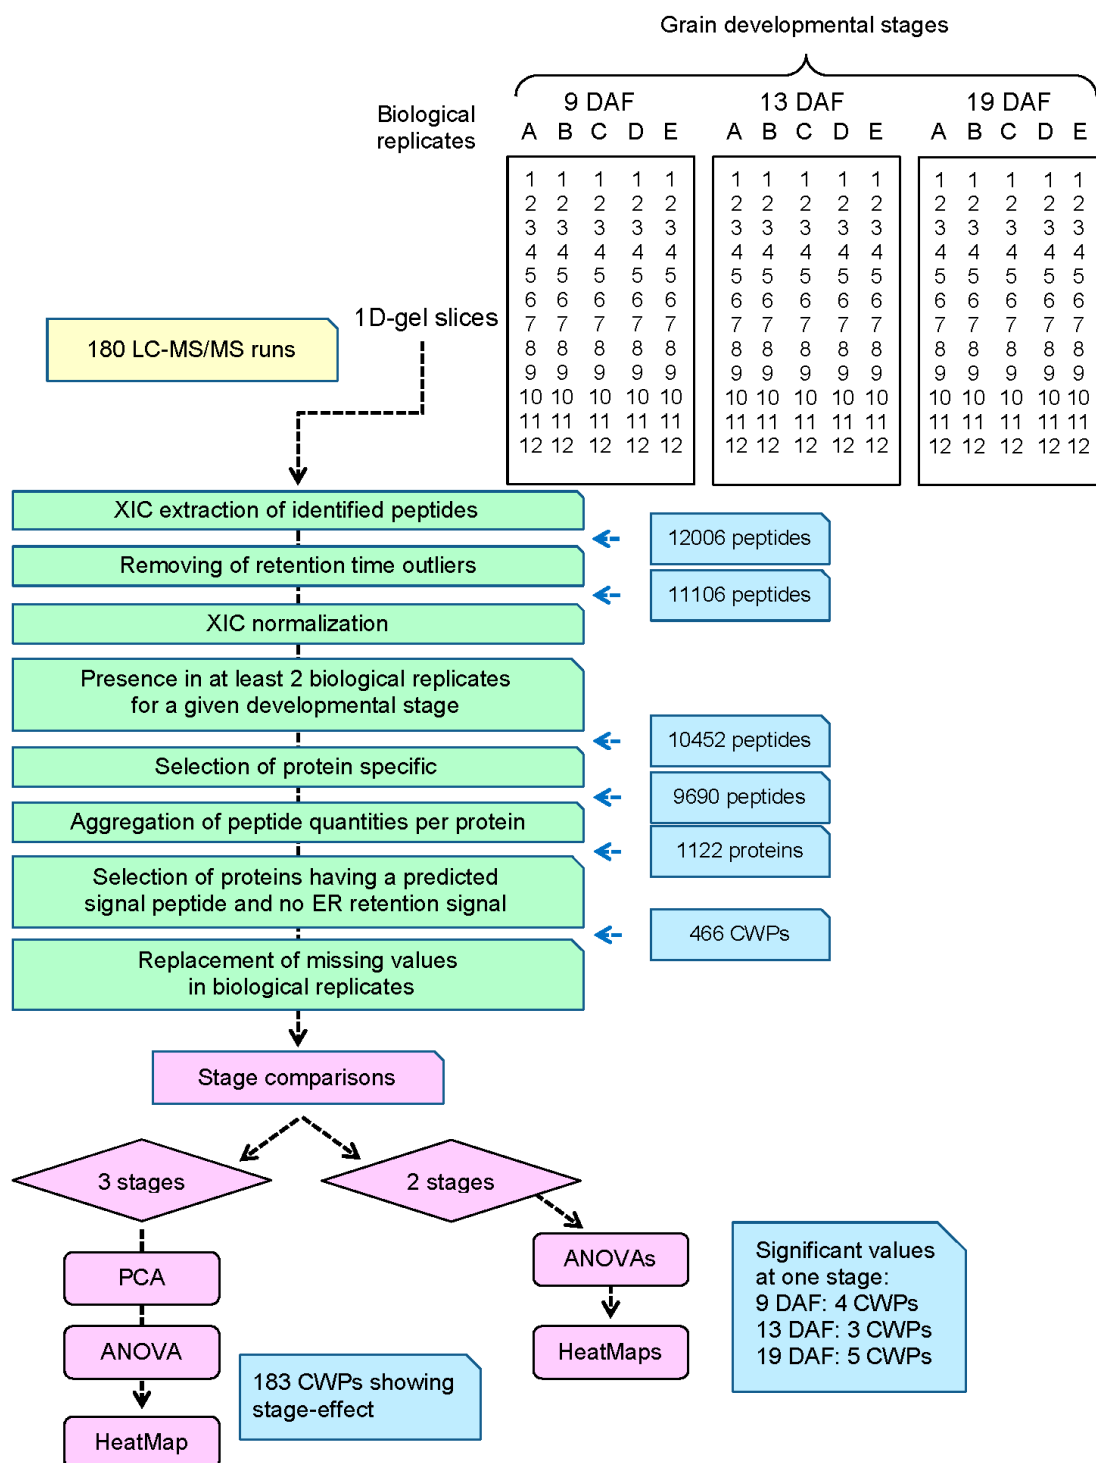

Figure S1. The workflow of our quantitative proteomic approach.

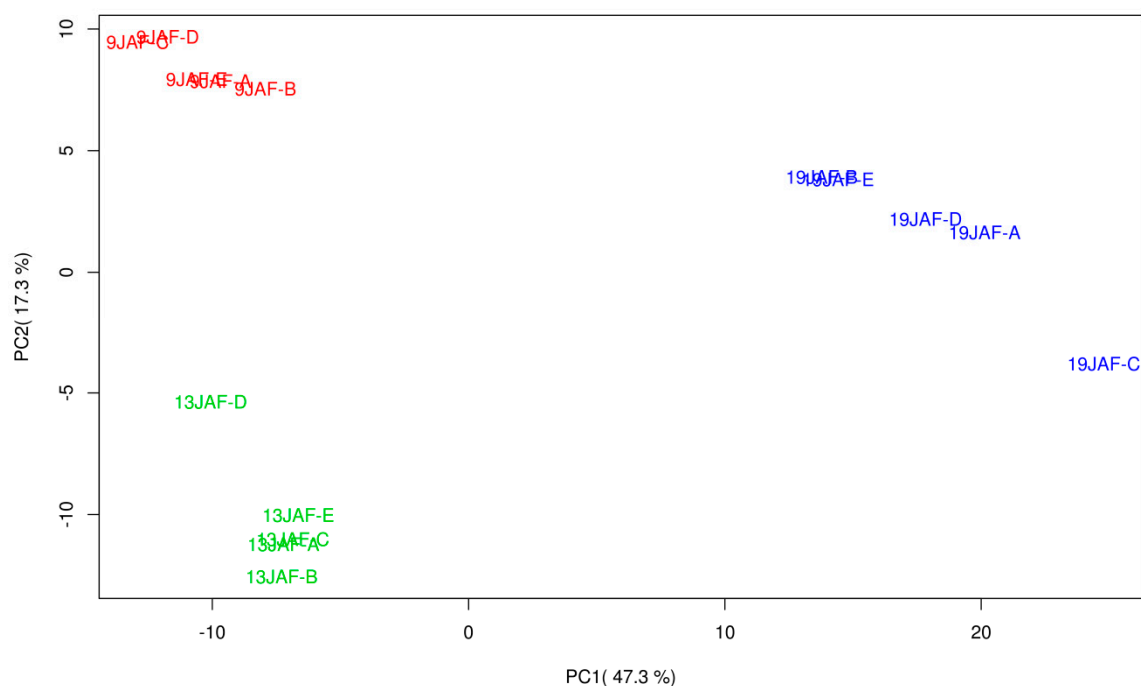

**Figure S2.** Principal Component Analysis (PCA) performed using the relative amounts of the CWP's at the three developmental stages of the *B. distachyon* grain. Individual map of biological replicates (red: 9DAF samples, green: 13DAF, blue: 19DAF samples) along principal components 1 and 2.

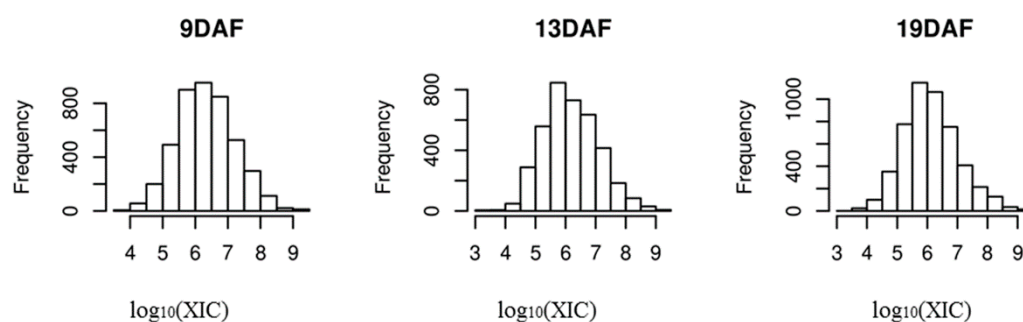

**Figure S3.** The distribution of  $\log_{10}$ -transformed values of CWP's relative amounts (that is  $\log_{10}(\text{XIC})$ , where XIC of a CWP is the sum of peptide normalised XICs identifying the CWP) for the three developmental stages.

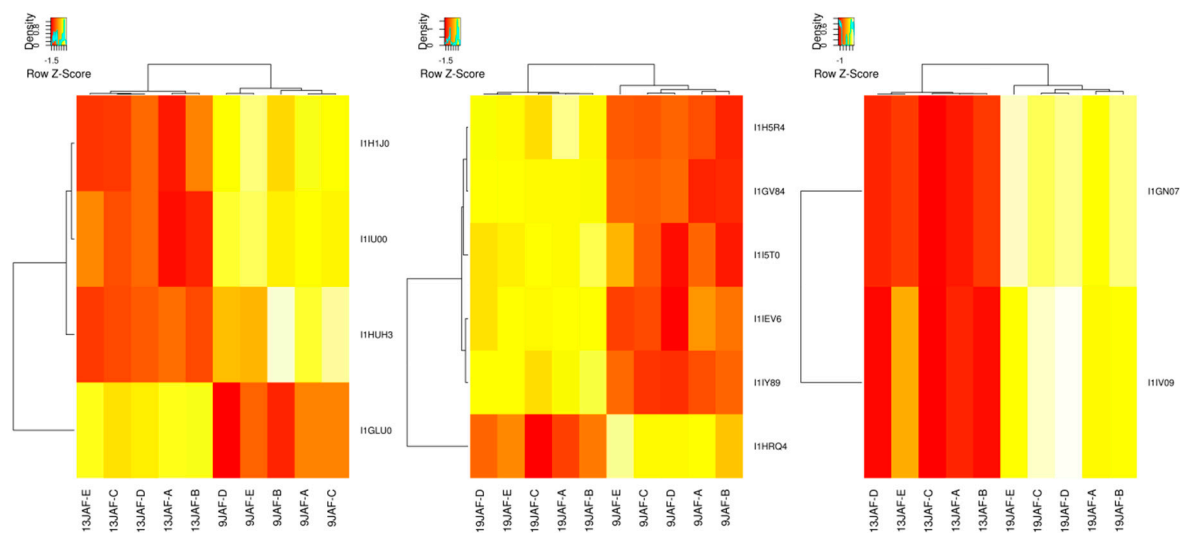

**Figure S4.** Heat maps of relative amounts of the CWPs identified at only two grain developmental stages. The variation in the protein abundance is shown by a color code ranging from **yellow** (proteins the most accumulated) to **red** (for proteins the less accumulated).

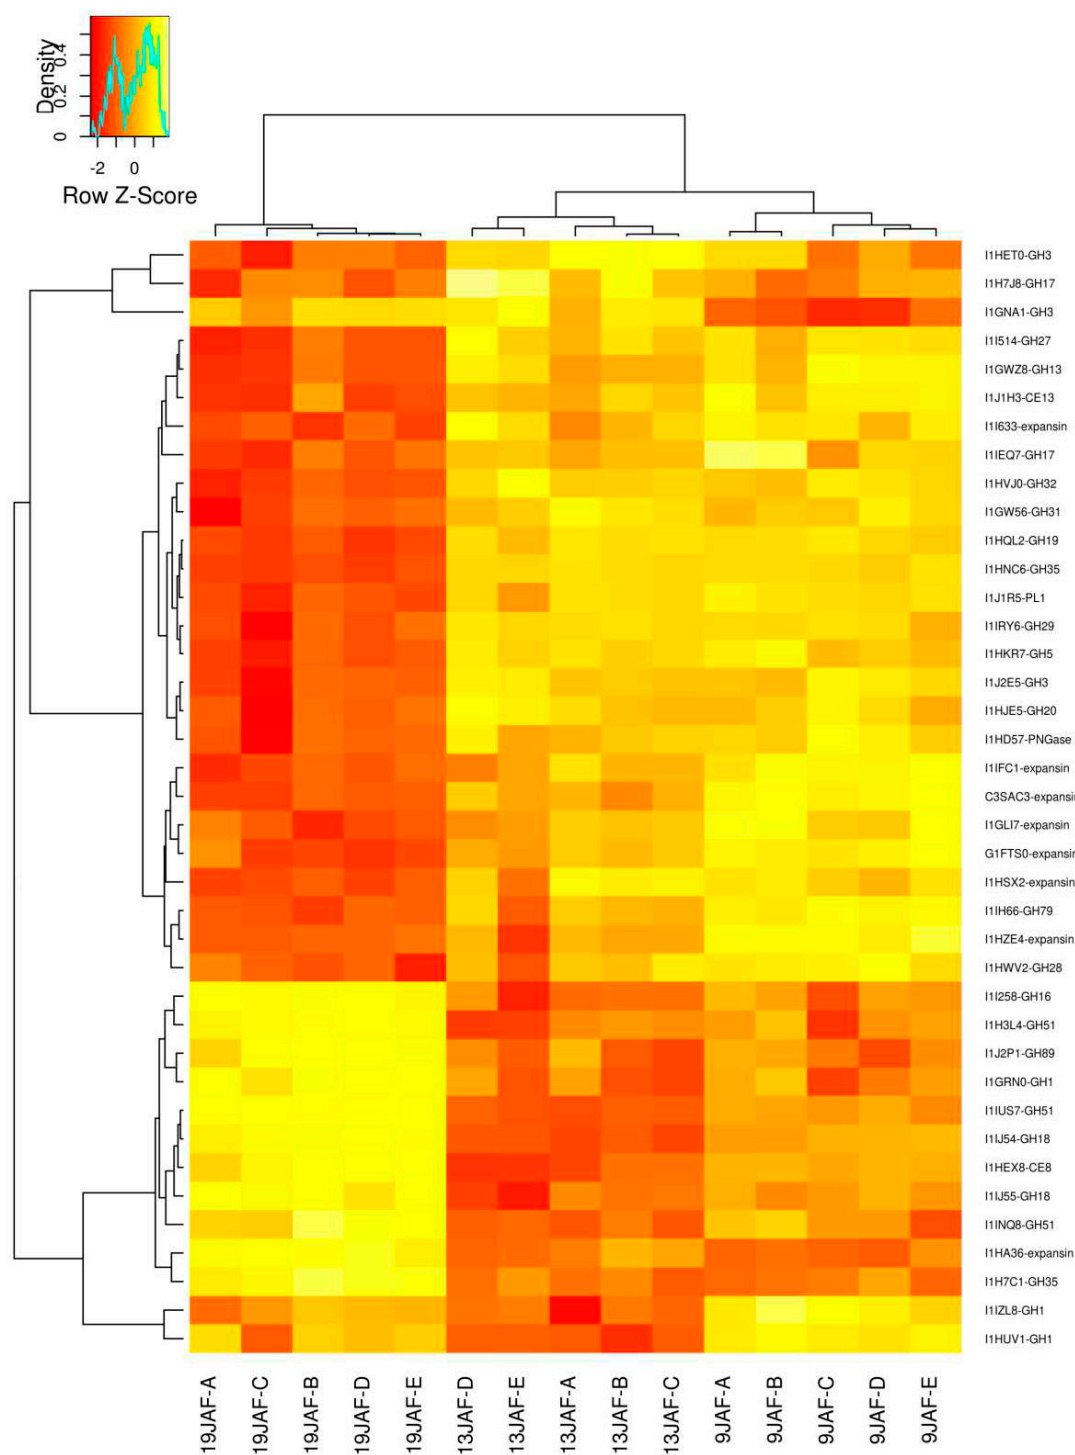

**Figure S5.** The heat map of the PACs identified at the three developmental stages of the *B. distachyon* grain. The 5 biological replicates are represented for each stage. The variation in the protein abundance is shown by a colour code ranging from **yellow** (the most abundant proteins) to **red** (the less abundant proteins).

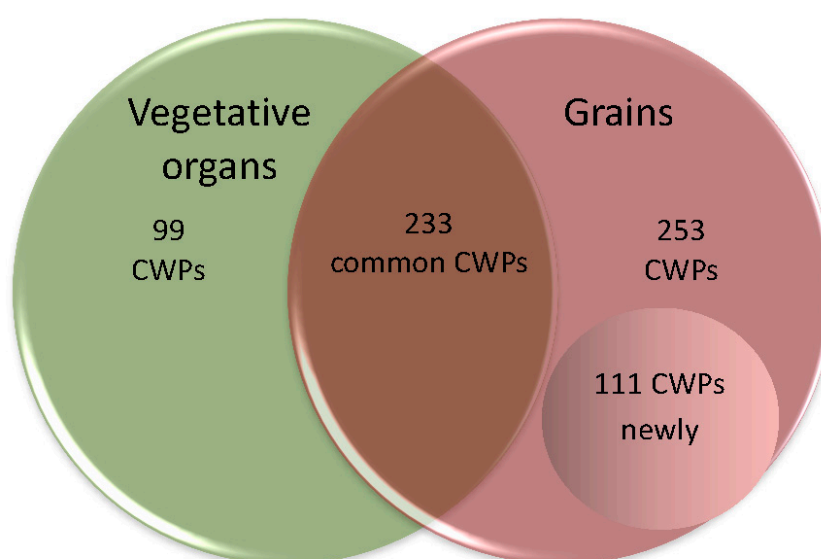

**Figure S6.** Venn diagram showing the distribution of CWPs among the grains and the others tissues/organs of *Brachypodium distachyon* (according to the data listed in the WallProtDB database).
